# Supplementary material for: Ultra-High-Performance Liquid Chromatography–Electrospray Ionization–High-Resolution Mass Spectrometry for Distinguishing the Origin of Ellagic Acid Extracts: Pomegranate Peels or Gallnuts
Source: MDPI journal article supplement (doi:10.3390/molecules29030666), 2024-01-31
Supplement: s1 [file s1]

# Ultra-High-Performance Liquid Chromatography–Electrospray Ionization–High-Resolution Mass Spectrometry for Distinguishing the Origin of Ellagic Acid Extracts: Pomegranate Peels or Gallnuts

Jinchao Wei <sup>1,2</sup>, Renjian Xu <sup>3</sup>, Yuanyuan Zhang <sup>1,2</sup>, Lingyu Zhao <sup>1,2</sup>, Shumu Li <sup>1</sup>  
and Zhenwen Zhao <sup>1,2,\*</sup>

- <sup>1</sup> Beijing National Laboratory for Molecular Sciences, CAS Research/Education Center for Excellence in Molecular Sciences, Key Laboratory of Analytical Chemistry for Living Biosystems, Beijing Mass Spectrum Center, Institute of Chemistry, Chinese Academy of Sciences, Beijing 100190, China; weijinchao@iccas.ac.cn (J.W.); zhangyuanyuan@iccas.ac.cn (Y.Z.); zhaolingyu@iccas.ac.cn (L.Z.); lishumu@iccas.ac.cn (S.L.)
- <sup>2</sup> Graduate School, University of Chinese Academy of Sciences, Beijing 100049, China
- <sup>3</sup> Anhui Deren Biotechnology Co., Ltd., Suzhou 234122, China; xrj.hbzy@163.com
- \* Correspondence: zhenwenzhao@iccas.ac.cn

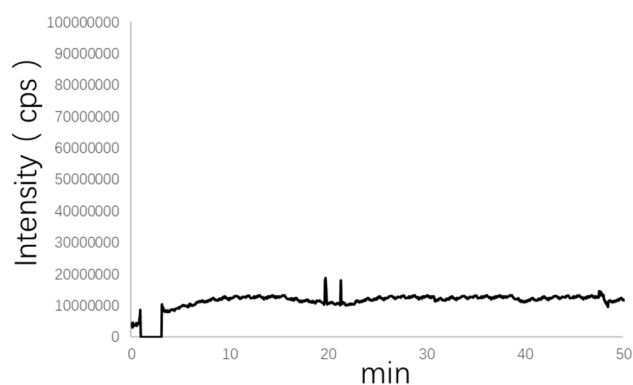

**Figure S1.** The total ion chromatograms of blank.

**Table S1.** The result when detecting 0.02 µg/mL ginkgolic acid (C15:1) and anacardic acid.

|       | Ginkgolic acid (C15:1) |       |       |           | Anacardic acid |       |       |           |
|-------|------------------------|-------|-------|-----------|----------------|-------|-------|-----------|
|       | Intra day              |       |       | Inter day | Intra day      |       |       | Inter day |
|       | Day 1                  | Day 2 | Day 3 |           | Day 1          | Day 2 | Day 3 |           |
| Mean  | 0.019                  | 0.018 | 0.018 | 0.019     | 0.021          | 0.022 | 0.022 | 0.022     |
| RSD   | 3.9                    | 2.4   | 2.6   | 3.7       | 7.2            | 5.6   | 3.8   | 2.3       |
| Error | -3.2                   | -8.1  | -9.0  | 6.8       | 5.9            | 9.8   | 10.0  | 8.5       |
